# Supplementary material
Source: PubMed Central journal article supplement (PMC4061906)
Supplement: NIHMS545912-supplement-supplementary_data.pdf [file NIHMS545912-supplement-supplementary_data.pdf]

## Electronic supplementary material

**ESM Fig. 1** **a** Insulin-stimulated glucose uptake in white adipose tissue and **(b)** brown adipose tissue in *Trib3* ASO-treated animals. **c** Akt activity in white adipose tissue at the end of the clamp Dark grey bars represent controls, white bars represent *Trib3* ASO-treated animals. Values are mean $\pm$ SE

**ESM Fig. 2** Phosphorylation of Akt at Ser 473 and Thr 308 in liver **(a)**, white adipose tissue (WAT) **(b)** and soleus **(c)** after insulin stimulation. Dark grey bars represent controls, light grey bars represent *Trib3* ASO-treated animals. Values are mean $\pm$ SE. \* $p < 0.05$

Supplemental Figure 1

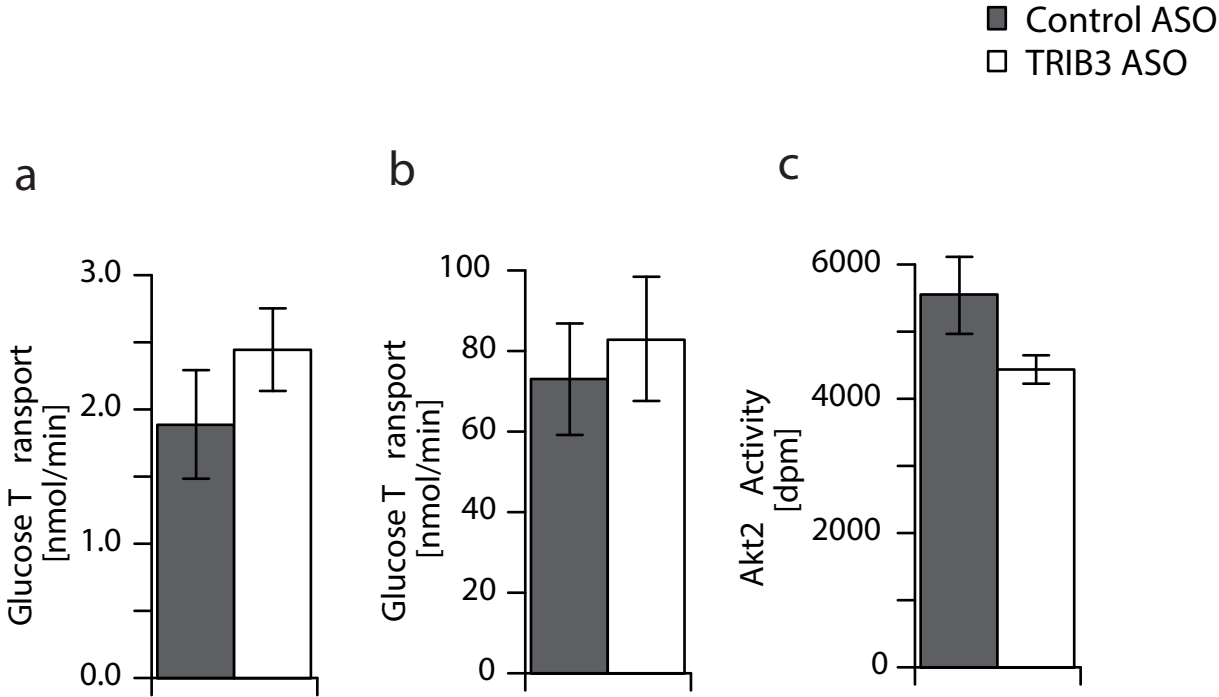

## Supplemental Figure 2

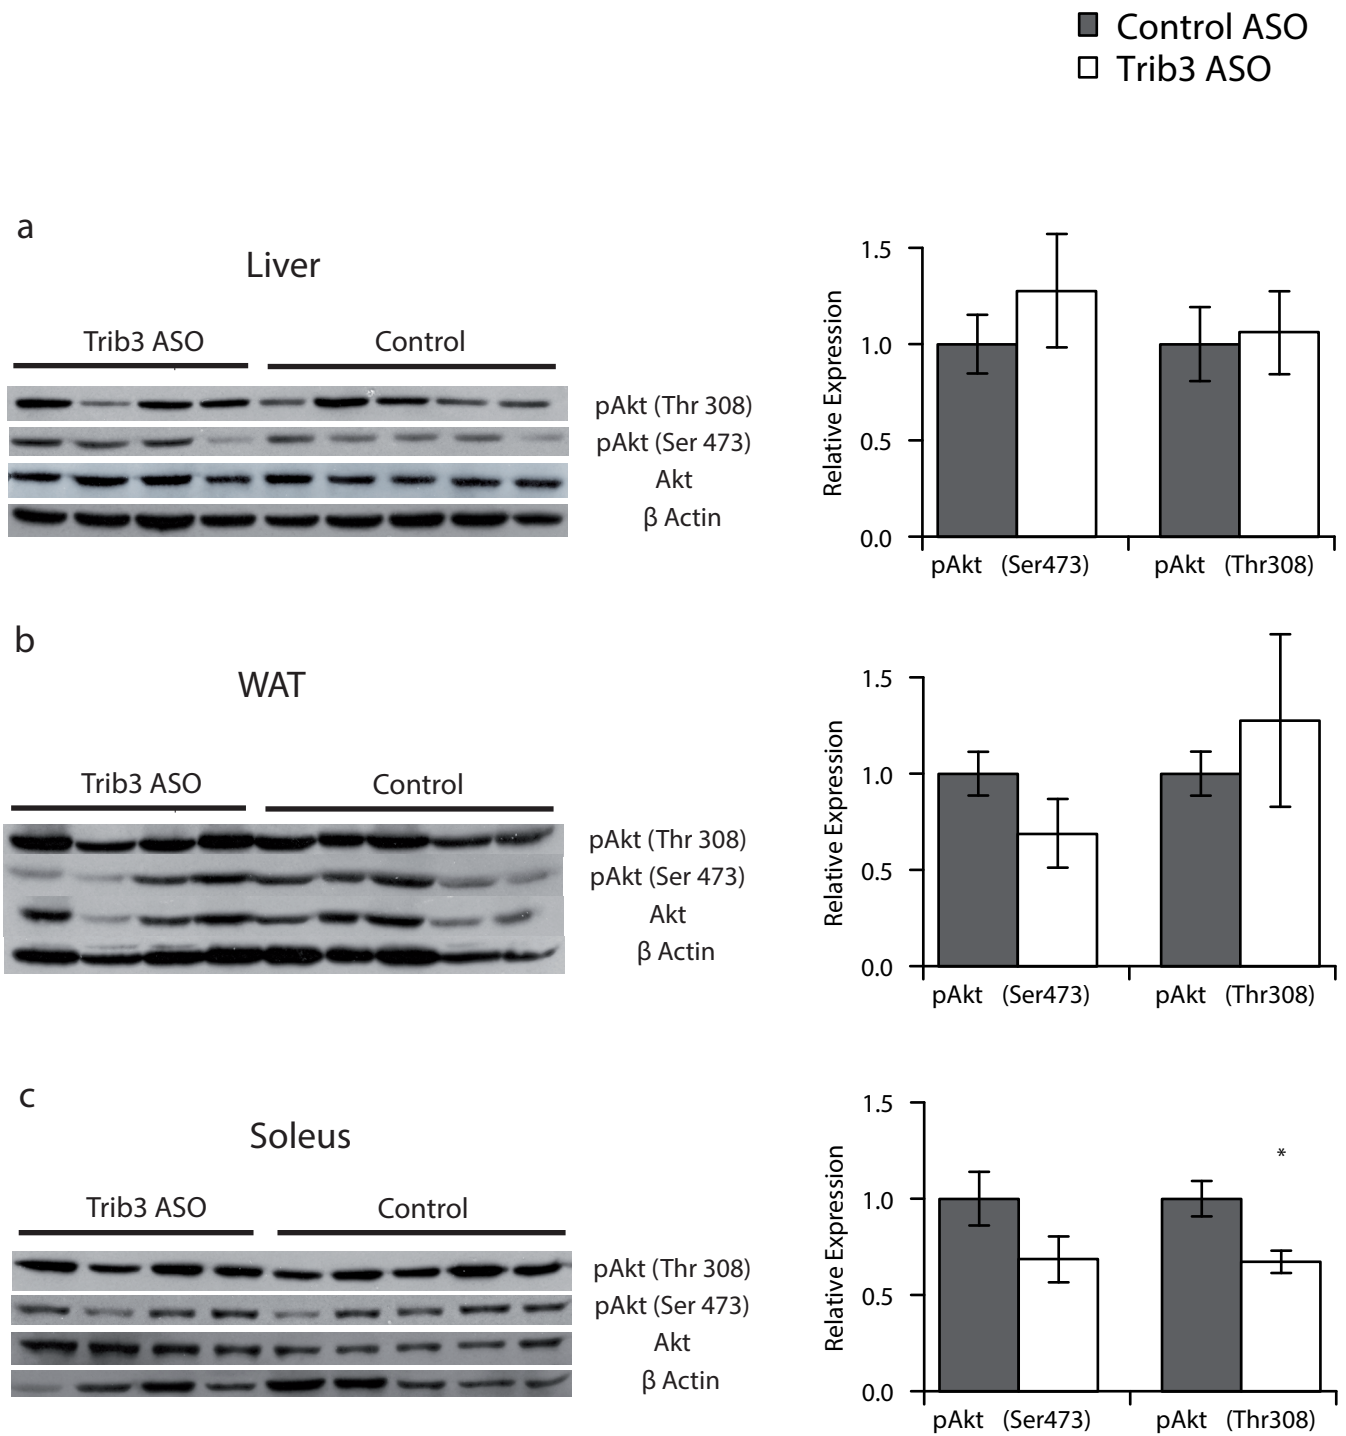

### Supplemental Data

Phosphorylation of AKT at Ser 473 and Thr 308 in liver (a), WAT (b) and soleus (c) after insulin stimulation. Dark gray bars represent controls and light gray bars represent TRB-3 ASO treated animals. Values are give as mean +/- SE. \*, \*\* p-value < 0.05 or < 0.01, resp. or as depicted.
